# Supplementary material
Source: publisher site journal article supplement (https://static.cambridge.org/content/id/urn:cambridge.org:id:article:S0956796822000107/resource/name/S0956796822000107supp002.v)
Supplement: Supplementary file 1 [file S0956796822000107supp002.v]

(* fold_unfold_lemmas.v *)
(* this file accompanies
     Fold-Unfold Lemmas
     for Equational Reasoning about Recursive Programs
     in the Coq Proof Assistant
   by Olivier Danvy <danvy@acm.org> *)
(* Singapore, 2020-2022 *)

(* ********** *)

Require Import Arith Bool.

(* ********** *)

(* Paraphernalia: *)

(* {FOLD_UNFOLD_TACTIC} *)
Ltac fold_unfold_tactic name := intros; unfold name; fold name; reflexivity.
(* {END} *)

(*
(* {FOLD_UNFOLD_TACTIC_SHORTER} *)
Ltac fold_unfold := intros; reflexivity.
(* {END} *)
*)

(*
(* {SUPER_SHORT_PROOF_OF_ALL_FOLD_UNFOLD_LEMMAS} *)
Proof.
  fold_unfold.
Qed.
(* {END} *)
*)

(*
(* {EQUIVALENT_SUPER_SHORT_PROOF_OF_ALL_FOLD_UNFOLD_LEMMAS} *)
Proof.
  intros; reflexivity.
Qed.
(* {END} *)
*)

(* ********** *)

(* Section 1 *)

Definition foo (x : bool) : nat :=
  if x then 1 else 0.

Lemma about_foo :
  foo true = 1 /\ foo false = 0 /\ forall y : bool, foo y = if y then 1 else 0.
Proof.
  split.
  { unfold foo.
    reflexivity. }
  split.
  { unfold foo.
    reflexivity. }
  intro y.
  unfold foo.
  reflexivity.

  Restart.

  split.
  { fold (foo true).
    reflexivity. }
  split.
  { fold (foo false).
    reflexivity. }
  intro y.
  fold (foo y).
  reflexivity.
Qed.

(* ********** *)

(* Section 2 *)

(* {BINARY_TREE} *)
Inductive binary_tree (V : Type) : Type :=
| Leaf : V -> binary_tree V
| Node : binary_tree V -> binary_tree V -> binary_tree V.
(* {END} *)

(* ***** *)

(* {SPECIFICATION_OF_MIRROR} *)
Definition specification_of_mirror
                (mirror : forall V : Type, binary_tree V -> binary_tree V) : Prop :=
  (forall (V : Type) (v : V),
      mirror V (Leaf V v) = Leaf V v)
  /\
  (forall (V : Type) (t1 t2 : binary_tree V),
      mirror V (Node V t1 t2) = Node V (mirror V t2) (mirror V t1)).
(* {END} *)

(* ***** *)

(* {THERE_IS_AT_MOST_ONE_MIRROR} *)
Proposition there_is_at_most_one_mirror :
  forall mirror1 mirror2 : forall V : Type, binary_tree V -> binary_tree V,
    specification_of_mirror mirror1 ->
    specification_of_mirror mirror2 ->
    forall (V : Type) (t : binary_tree V),
      mirror1 V t = mirror2 V t.
(* {END} *)
(* {PROOF_OF_THERE_IS_AT_MOST_ONE_MIRROR_PART_1} *)
Proof.
  intros mirror1 mirror2.
  unfold specification_of_mirror.
  intros [S_mirror1_Leaf S_mirror1_Node] [S_mirror2_Leaf S_mirror2_Node].
  intros V t.
(* {END} *)
(* {PROOF_OF_THERE_IS_AT_MOST_ONE_MIRROR_PART_2} *)
  induction t as [v | t1 IHt1 t2 IHt2].
  - 
(* {END} *)
(* {PROOF_OF_THERE_IS_AT_MOST_ONE_MIRROR_PART_3} *)
    rewrite -> (S_mirror1_Leaf V v).
    rewrite -> (S_mirror2_Leaf V v).
(* {END} *)
(* {PROOF_OF_THERE_IS_AT_MOST_ONE_MIRROR_PART_4} *)
    reflexivity.
  - 
(* {END} *)
(* {PROOF_OF_THERE_IS_AT_MOST_ONE_MIRROR_PART_5} *)
    rewrite -> (S_mirror1_Node V t1 t2).
    rewrite -> (S_mirror2_Node V t1 t2).
(* {END} *)
(* {PROOF_OF_THERE_IS_AT_MOST_ONE_MIRROR_PART_6} *)
    rewrite -> IHt1.
    rewrite -> IHt2.
(* {END} *)
(* {PROOF_OF_THERE_IS_AT_MOST_ONE_MIRROR_PART_7} *)
    reflexivity.
Qed.
(* {END} *)

(* ***** *)

(* {A_FUNCTION_THAT_SATISFIES_THE_SPECIFICATION_OF_MIRROR_IS_INVOLUTORY} *)
Theorem a_function_that_satisfies_the_specification_of_mirror_is_involutory :
  forall mirror : forall V : Type, binary_tree V -> binary_tree V,
    specification_of_mirror mirror ->
    forall (V : Type) (t : binary_tree V),
      mirror V (mirror V t) = t.
(* {END} *)
(* {PROOF_OF_A_FUNCTION_THAT_SATISFIES_THE_SPECIFICATION_OF_MIRROR_IS_INVOLUTORY} *)
Proof.
  intro mirror.
  unfold specification_of_mirror.
  intros [S_mirror_Leaf S_mirror_Node].
  intros V t.
  (* goal: mirror V (mirror V t) = t *)
  induction t as [v | t1 IHt1 t2 IHt2].
  { (* goal: mirror V (mirror V (Leaf V v)) = Leaf V v *)
    rewrite -> (S_mirror_Leaf V v).
    (* goal: mirror V (Leaf V v) = Leaf V v *)
    rewrite -> (S_mirror_Leaf V v).
    (* goal: Leaf V v = Leaf V v *)
    reflexivity. }
  { (* IHt1 : mirror V (mirror V t1) = t1 *)
    (* IHt2 : mirror V (mirror V t2) = t2 *)
    (* goal: mirror V (mirror V (Node V t1 t2)) = Node V t1 t2 *)
    rewrite -> (S_mirror_Node V t1 t2).
    (* goal: mirror V (Node V (mirror V t2) (mirror V t1)) = Node V t1 t2 *)
    rewrite -> (S_mirror_Node V (mirror V t2) (mirror V t1)).
    (* goal: Node V (mirror V (mirror V t1)) (mirror V (mirror V t2)) = Node V t1 t2 *)
    rewrite -> IHt1.
    (* goal: Node V t1 (mirror V (mirror V t2)) = Node V t1 t2 *)
    rewrite -> IHt2.
    (* goal: Node V t1 t2 = Node V t1 t2 *)
    reflexivity. }
Qed.
(* {END} *)

(* ********** *)

(* Section 3 *)

(* {MIRROR} *)
Fixpoint mirror (V : Type) (t : binary_tree V) : binary_tree V :=
  match t with
  | Leaf _ v     => Leaf V v
  | Node _ t1 t2 => Node V (mirror V t2) (mirror V t1)
  end.
(* {END} *)

(*
(* {FOLD_UNFOLD_MIRROR_LEAF_INCOMPLETE} *)
Lemma fold_unfold_mirror_Leaf :
  forall (V : Type) (v : V),
    mirror V (Leaf V v) = ....
(* {END} *)

(* {FOLD_UNFOLD_MIRROR_NODE_INCOMPLETE} *)
Lemma fold_unfold_mirror_Node :
  forall (V : Type) (t1 t2 : binary_tree V),
    mirror V (Node V t1 t2) = ...
(* {END} *)
*)

(*
(* {PROOF_ADMITTED_FOR_NOW} *)
Admitted. (* for now *)
(* {END} *)
*)

(*
(* {FOLD_UNFOLD_MIRROR_LEAF_ADMITTED_FOR_NOW} *)
Lemma fold_unfold_mirror_Leaf :
  forall (V : Type) (v : V),
    mirror V (Leaf V v) = Leaf V v.
Admitted. (* for now *)
(* {END} *)
*)

(* {FOLD_UNFOLD_MIRROR_LEAF} *)
Lemma fold_unfold_mirror_Leaf :
  forall (V : Type) (v : V),
    mirror V (Leaf V v) = Leaf V v.
(* {END} *)
(* {PROOF_OF_FOLD_UNFOLD_MIRROR_LEAF} *)
Proof.
  fold_unfold_tactic mirror.
Qed.
(* {END} *)

(*
(* {FOLD_UNFOLD_MIRROR_NODE_ADMITTED_FOR_NOW} *)
Lemma fold_unfold_mirror_Node :
  forall (V : Type) (t1 t2 : binary_tree V),
    mirror V (Node V t1 t2) = Node V (mirror V t2) (mirror V t1).
Admitted. (* for now *)
(* {END} *)
*)

(* {FOLD_UNFOLD_MIRROR_NODE} *)
Lemma fold_unfold_mirror_Node :
  forall (V : Type) (t1 t2 : binary_tree V),
    mirror V (Node V t1 t2) = Node V (mirror V t2) (mirror V t1).
(* {END} *)
Proof.
  fold_unfold_tactic mirror.
Qed.

(* ***** *)

Proposition there_is_at_least_one_mirror_function_first_try :
  specification_of_mirror mirror.
(* {END} *)
Proof.
  unfold specification_of_mirror.
  split.
  - intros V v.
    unfold mirror.
    reflexivity.
  - intros V t1 t2.
    unfold mirror.
    fold mirror.
    reflexivity.
Qed.

(*
(* {THERE_IS_AT_LEAST_ONE_MIRROR_FUNCTION_STATEMENT_ADMITTED_FOR_NOW} *)
Proposition there_is_at_least_one_mirror_function :
  specification_of_mirror mirror.
Admitted. (* for now *)
(* {END} *)
*)

(* ***** *)

(* Section 5 *)

Proposition there_is_at_least_one_mirror_function_with_split :
  specification_of_mirror mirror.
Proof.
  unfold specification_of_mirror.
  split.
  - exact fold_unfold_mirror_Leaf.
  - exact fold_unfold_mirror_Node.
Qed.

(* {THERE_IS_AT_LEAST_ONE_MIRROR_FUNCTION} *)
Proposition there_is_at_least_one_mirror_function :
  specification_of_mirror mirror.
Proof.
  unfold specification_of_mirror.
  exact (conj fold_unfold_mirror_Leaf fold_unfold_mirror_Node).
Qed.
(* {END} *)

(* ***** *)

(* {MIRROR_IS_INVOLUTORY} *)
Theorem mirror_is_involutory :
  forall (V : Type) (t : binary_tree V),
    mirror V (mirror V t) = t.
Proof.
  exact (a_function_that_satisfies_the_specification_of_mirror_is_involutory
           mirror
           there_is_at_least_one_mirror_function).
Qed.
(* {END} *)

(* {MIRROR_IS_INVOLUTORY_ALT} *)
Theorem mirror_is_involutory_alt :
  forall (V : Type) (t : binary_tree V),
    mirror V (mirror V t) = t.
(* {END} *)
(* {PROOF_OF_MIRROR_IS_INVOLUTORY_ALT_PART_1} *)
Proof.
  intros V t.
(* {END} *)
(* {PROOF_OF_MIRROR_IS_INVOLUTORY_ALT_PART_2} *)
  induction t as [v | t1 IHt1 t2 IHt2].
  -  
(* {END} *)
(* {PROOF_OF_MIRROR_IS_INVOLUTORY_ALT_PART_3} *)
    rewrite -> (fold_unfold_mirror_Leaf V v).
(* {END} *)
(* {PROOF_OF_MIRROR_IS_INVOLUTORY_ALT_PART_4} *)
    exact (fold_unfold_mirror_Leaf V v).
  - 
(* {END} *)
(* {PROOF_OF_MIRROR_IS_INVOLUTORY_ALT_PART_5} *)
    rewrite -> (fold_unfold_mirror_Node V t1 t2).
(* {END} *)
(* {PROOF_OF_MIRROR_IS_INVOLUTORY_ALT_PART_6} *)
    rewrite -> (fold_unfold_mirror_Node V (mirror V t2) (mirror V t1)).
(* {END} *)
(* {PROOF_OF_MIRROR_IS_INVOLUTORY_ALT_PART_7} *)
    rewrite -> IHt1.
    rewrite -> IHt2.
(* {END} *)
(* {PROOF_OF_MIRROR_IS_INVOLUTORY_ALT_PART_8} *)
    reflexivity.
Qed.
(* {END} *)

(* ********** *)

(* Section 6.1 *)

(* {MIRRORPRIME_CPS} *)
Fixpoint mirror'_cps (Ans V : Type) (t : binary_tree V) (k : binary_tree V -> Ans) :
                                                                              Ans :=
  match t with
  | Leaf _ v     =>
    k (Leaf V v)
  | Node _ t1 t2 =>
    mirror'_cps Ans V t1 (fun t1_m =>
                            mirror'_cps Ans V t2 (fun t2_m =>
                                                    k (Node V t2_m t1_m)))
  end.
(* {END} *)

(*
(* {FOLD_UNFOLD_MIRRORPRIME_CPS_LEAF_INCOMPLETE} *)
Lemma fold_unfold_mirror'_cps_Leaf :
  forall (Ans V : Type) (v : V) (k : binary_tree V -> Ans),
    mirror'_cps Ans V (Leaf V v) k = ...
Proof. ...
(* {END} *)

(* {FOLD_UNFOLD_MIRRORPRIME_CPS_NODE_INCOMPLETE} *)
Lemma fold_unfold_mirror'_cps_Node :
  forall (Ans V : Type) (t1 t2 : binary_tree V) (k : binary_tree V -> Ans),
    mirror'_cps Ans V (Node V t1 t2) k = ...
Proof. ...
(* {END} *)
*)

(*
(* {FOLD_UNFOLD_MIRRORPRIME_CPS_LEAF_ADMITTED_FOR_NOW} *)
Lemma fold_unfold_mirror'_cps_Leaf :
  forall (Ans V : Type) (v : V) (k : binary_tree V -> Ans),
    mirror'_cps Ans V (Leaf V v) k =
    k (Leaf V v).
Admitted. (* for now *)
(* {END} *)
*)

(* {FOLD_UNFOLD_MIRRORPRIME_CPS_LEAF} *)
Lemma fold_unfold_mirror'_cps_Leaf :
  forall (Ans V : Type) (v : V) (k : binary_tree V -> Ans),
    mirror'_cps Ans V (Leaf V v) k =
    k (Leaf V v).
(* {END} *)
Proof.
  fold_unfold_tactic mirror'_cps.
Qed.

(*
(* {FOLD_UNFOLD_MIRRORPRIME_CPS_NODE_ADMITTED_FOR_NOW} *)
Lemma fold_unfold_mirror'_cps_Node :
  forall (Ans V : Type) (t1 t2 : binary_tree V) (k : binary_tree V -> Ans),
    mirror'_cps Ans V (Node V t1 t2) k =
    mirror'_cps Ans V t1 (fun t1_m =>
                            mirror'_cps Ans V t2 (fun t2_m =>
                                                    k (Node V t2_m t1_m))).
Admitted. (* for now *)
(* {END} *)
*)

(* {FOLD_UNFOLD_MIRRORPRIME_CPS_NODE} *)
Lemma fold_unfold_mirror'_cps_Node :
  forall (Ans V : Type) (t1 t2 : binary_tree V) (k : binary_tree V -> Ans),
    mirror'_cps Ans V (Node V t1 t2) k =
    mirror'_cps Ans V t1 (fun t1_m =>
                            mirror'_cps Ans V t2 (fun t2_m =>
                                                    k (Node V t2_m t1_m))).
(* {END} *)
Proof.
  fold_unfold_tactic mirror'_cps.
Qed.

(* {MIRRORPRIME} *)
Definition mirror' (V : Type) (t : binary_tree V) : binary_tree V :=
  mirror'_cps (binary_tree V) V t (fun t_m => t_m).
(* {END} *)

(* ***** *)

(*
(* {PROOF_WITH_ELLIPSES} *)
Proof. ... Qed. (* see the accompanying .v file *)
(* {END} *)
*)

(*
(* {COMPLETENESS_OF_MIRRORPRIME_CPS_WITH_ELLIPSES} *)
Lemma completeness_of_mirror'_cps :
  forall (V : Type) (t t_m : binary_tree V),
    mirror V t = t_m ->
    forall (Ans : Type) (k : binary_tree V -> Ans),
      mirror'_cps Ans V t k = k t_m.
Proof. ... Qed. (* see the accompanying .v file *)
(* {END} *)
*)

(* {COMPLETENESS_OF_MIRRORPRIME_CPS} *)
Lemma completeness_of_mirror'_cps :
  forall (V : Type) (t t_m : binary_tree V),
    mirror V t = t_m ->
    forall (Ans : Type) (k : binary_tree V -> Ans),
      mirror'_cps Ans V t k = k t_m.
(* {END} *)
Proof.
  intros V t.
  induction t as [v | t1 IHt1 t2 IHt2]; intro t_m.
  - rewrite -> (fold_unfold_mirror_Leaf V v).
    intro H_t_m.
    rewrite <- H_t_m.
    intros Ans k.
    rewrite -> (fold_unfold_mirror'_cps_Leaf Ans V v k).
    reflexivity.
  - rewrite -> (fold_unfold_mirror_Node V t1 t2).
    intro H_t_m.
    rewrite <- H_t_m.
    intros Ans k.
    rewrite -> (fold_unfold_mirror'_cps_Node Ans V t1 t2 k).
    Check (IHt1 (mirror V t1) (eq_refl (mirror V t1))).
    Check (IHt1 (mirror V t1) (eq_refl (mirror V t1)) Ans (fun t1_m : binary_tree V => mirror'_cps Ans V t2 (fun t2_m : binary_tree V => k (Node V t2_m t1_m)))).
    rewrite -> (IHt1 (mirror V t1) (eq_refl (mirror V t1)) Ans (fun t1_m : binary_tree V => mirror'_cps Ans V t2 (fun t2_m : binary_tree V => k (Node V t2_m t1_m)))).
    Check (IHt2 (mirror V t2) (eq_refl (mirror V t2)) Ans (fun t2_m : binary_tree V => k (Node V t2_m (mirror V t1)))).
    rewrite -> (IHt2 (mirror V t2) (eq_refl (mirror V t2)) Ans (fun t2_m : binary_tree V => k (Node V t2_m (mirror V t1)))).
    reflexivity.

  Restart.

(* {WHACK_A_MOLE} *)
  induction t; simpl; intros.
  - rewrite H.
    reflexivity.
  - (* rewrite IHt1. (* Error: Unable to find an instance for the variable t_m. *) *)
    rewrite (IHt1 (mirror V t1)). (* <- guess *)
    rewrite (IHt2 (mirror V t2)). (* <- educated guess (learning by doing, yay) *)
    rewrite H.


    reflexivity.
    reflexivity.
    reflexivity.
Qed.
(* {END} *)

Inductive cont (Ans V : Type) (k_init : binary_tree V -> Ans) : (binary_tree V -> Ans) -> Prop :=
| cont_0 :
    cont Ans V k_init k_init
| cont_1 :
    forall (k : binary_tree V -> Ans),
      cont Ans V k_init k ->
      forall t2 : binary_tree V,
        cont Ans V k_init (fun t1_m => mirror'_cps Ans V t2 (fun t2_m => k (Node V t2_m t1_m)))
| cont_2 :
    forall (k : binary_tree V -> Ans),
      cont Ans V k_init k ->
      forall t1_m : binary_tree V,
        cont Ans V k_init (fun t2_m => k (Node V t2_m t1_m)).

Definition injective (A B : Type) (f : A -> B) : Prop :=
  forall a1 a2 : A,
    f a1 = f a2 -> a1 = a2.

Lemma totality_of_mirror'_cps :
  forall (Ans V : Type)
         (t : binary_tree V)
         (k : binary_tree V -> Ans),
    exists t_m : binary_tree V,
      mirror'_cps Ans V t k = k t_m.
Proof.
  intros Ans V t.
  induction t as [v | t1 IHt1 t2 IHt2]; intro k.
  - rewrite -> fold_unfold_mirror'_cps_Leaf.
    exists (Leaf V v).
    reflexivity.
  - rewrite -> fold_unfold_mirror'_cps_Node.
    Check (IHt1 (fun t1_m : binary_tree V => mirror'_cps Ans V t2 (fun t2_m : binary_tree V => k (Node V t2_m t1_m)))).
    destruct (IHt1 (fun t1_m : binary_tree V => mirror'_cps Ans V t2 (fun t2_m : binary_tree V => k (Node V t2_m t1_m)))) as [t1_m H_t1_m].
    Check (IHt2 (fun t2_m : binary_tree V => k (Node V t2_m t1_m))).
    destruct (IHt2 (fun t2_m : binary_tree V => k (Node V t2_m t1_m))) as [t2_m H_t2_m].
    rewrite H_t2_m in H_t1_m.
    rewrite -> H_t1_m.
    exists (Node V t2_m t1_m).
    reflexivity.
Qed.

Proposition continuations_are_injective :
  forall (Ans V : Type)
         (k_init : binary_tree V -> Ans),
    injective (binary_tree V) Ans k_init ->
    forall k : binary_tree V -> Ans,
      cont Ans V k_init k ->
      injective (binary_tree V) Ans k.
Proof.
  unfold injective.
  intros Ans V k_init I_k_init k C_k.
  induction C_k as [ | k' C_k' IH_C_k' t2 | k' C_k' IH_C_k' t1_m].
  - exact I_k_init.
  - intros p_m q_m H_k'.
    Check (totality_of_mirror'_cps Ans V t2 (fun t2_m : binary_tree V => k' (Node V t2_m p_m))).
    destruct (totality_of_mirror'_cps Ans V t2 (fun t2_m : binary_tree V => k' (Node V t2_m p_m))) as [x_m H_x_m].
    Check (totality_of_mirror'_cps Ans V t2 (fun t2_m : binary_tree V => k' (Node V t2_m q_m))).
    destruct (totality_of_mirror'_cps Ans V t2 (fun t2_m : binary_tree V => k' (Node V t2_m q_m))) as [y_m H_y_m].
    rewrite -> H_x_m in H_k'.
    rewrite -> H_y_m in H_k'.
    Check (IH_C_k' (Node V x_m p_m) (Node V y_m q_m) H_k').
    assert (H_tmp := IH_C_k' (Node V x_m p_m) (Node V y_m q_m) H_k').
    injection H_tmp as H_x_m_y_m H_p_m_q_m .
    exact H_p_m_q_m.
  - intros p_m q_m H_k'.
    Check (IH_C_k' (Node V p_m t1_m) (Node V q_m t1_m) H_k').
    assert (H_tmp := IH_C_k' (Node V p_m t1_m) (Node V q_m t1_m) H_k').
    injection H_tmp as H_p_m_q_m.
    exact H_p_m_q_m.
Qed.

(* {SOUNDNESS_OF_MIRRORPRIME_CPS} *)
Lemma soundness_of_mirror'_cps :
  forall (V : Type) (t t_m : binary_tree V) (Ans : Type) (k_init : binary_tree V -> Ans),
    injective (binary_tree V) Ans k_init ->
    forall k : binary_tree V -> Ans,
      cont Ans V k_init k ->
      mirror'_cps Ans V t k = k t_m ->
      mirror V t = t_m.
(* {END} *)
Proof.
  intros V t t_m Ans k_init I_k_init k C_k H_cps.
  Check (completeness_of_mirror'_cps V t (mirror V t) (eq_refl (mirror V t)) Ans k).
  rewrite -> (completeness_of_mirror'_cps V t (mirror V t) (eq_refl (mirror V t)) Ans k) in H_cps.
  Check (continuations_are_injective Ans V k_init I_k_init k C_k).
  assert (I_k := continuations_are_injective Ans V k_init I_k_init k C_k).
  unfold injective in I_k.
  Check (I_k (mirror V t) t_m H_cps).
  exact (I_k (mirror V t) t_m H_cps).
Qed.

(* {EQUIVALENCE_OF_MIRRORPRIME_AND_MIRROR} *)
Theorem equivalence_of_mirror'_and_mirror :
  forall (V : Type) (t : binary_tree V),
    mirror' V t = mirror V t.
Proof.
  intros V t.
  unfold mirror'.
  exact (completeness_of_mirror'_cps
           V t (mirror V t) (eq_refl (mirror V t)) (binary_tree V) (fun t_m => t_m)).
Qed.
(* {END} *)

Theorem equivalence_of_mirror'_and_mirror_more_explicitly :
  forall (V : Type)
         (t t_m : binary_tree V),
    mirror' V t = t_m <-> mirror V t = t_m.
Proof.
  intros V t t_m.
  unfold mirror'.
  split.
  - intro H_mirror'_cps.
    Check (soundness_of_mirror'_cps V t t_m (binary_tree V) (fun t_m => t_m)).
    assert (I_k_init : injective (binary_tree V) (binary_tree V) (fun t_m : binary_tree V => t_m)).
    { unfold injective.
      intros t1 t2 H_t1_t2.
      exact H_t1_t2. }
    Check (soundness_of_mirror'_cps V t t_m (binary_tree V) (fun t_m => t_m) I_k_init).
    Check (cont_0 (binary_tree V) V (fun t_m => t_m)).
    Check (soundness_of_mirror'_cps V t t_m (binary_tree V) (fun t_m => t_m) I_k_init (fun t_m => t_m) (cont_0 (binary_tree V) V (fun t_m => t_m))).
    Check (soundness_of_mirror'_cps V t t_m (binary_tree V) (fun t_m => t_m) I_k_init (fun t_m => t_m) (cont_0 (binary_tree V) V (fun t_m => t_m)) H_mirror'_cps).
    exact (soundness_of_mirror'_cps V t t_m (binary_tree V) (fun t_m => t_m) I_k_init (fun t_m => t_m) (cont_0 (binary_tree V) V (fun t_m => t_m)) H_mirror'_cps).
  - intro H_mirror.
    Check (completeness_of_mirror'_cps V t t_m H_mirror (binary_tree V) (fun t_m => t_m)).
    exact (completeness_of_mirror'_cps V t t_m H_mirror (binary_tree V) (fun t_m => t_m)).
Qed.

(* ********** *)

(* Section 6.2 *)

(* ***** *)

(* {NAT_FOLD_RIGHT} *)
Definition nat_fold_right (V : Type) (z : V) (s : V -> V) (n : nat) : V :=
  let fix visit n :=
    match n with
    | O    => z
    | S n' => s (visit n')
    end
  in visit n.
(* {END} *)

(*
(* {FOLD_UNFOLD_NAT_FOLD_RIGHT_O_ADMITTED_FOR_NOW} *)
Lemma fold_unfold_nat_fold_right_O :
  forall (V : Type) (z : V) (s : V -> V),
    nat_fold_right V z s O = z.
Admitted. (* for now *)
(* {END} *)
*)

(* {FOLD_UNFOLD_NAT_FOLD_RIGHT_O} *)
Lemma fold_unfold_nat_fold_right_O :
  forall (V : Type) (z : V) (s : V -> V),
    nat_fold_right V z s O = z.
(* {END} *)
Proof.
  fold_unfold_tactic nat_fold_right.
Qed.

(*
(* {FOLD_UNFOLD_NAT_FOLD_RIGHT_S_ADMITTED_FOR_NOW} *)
Lemma fold_unfold_nat_fold_right_S :
  forall (V : Type) (z : V) (s : V -> V) (n' : nat),
    nat_fold_right V z s (S n') = s (nat_fold_right V z s n').
Admitted. (* for now *)
(* {END} *)
*)

(* {FOLD_UNFOLD_NAT_FOLD_RIGHT_S} *)
Lemma fold_unfold_nat_fold_right_S :
  forall (V : Type) (z : V) (s : V -> V) (n' : nat),
    nat_fold_right V z s (S n') = s (nat_fold_right V z s n').
(* {END} *)
Proof.
  fold_unfold_tactic nat_fold_right.
Qed.

(* ***** *)

(* {NAT_FOLD_LEFT} *)
Definition nat_fold_left (V : Type) (z : V) (s : V -> V) (n : nat) : V :=
  let fix loop n a :=
    match n with
    | O    => a
    | S n' => loop n' (s a)
    end
  in loop n z.
(* {END} *)

(*
(* {FOLD_UNFOLD_NAT_FOLD_LEFT_O_ADMITTED_FOR_NOW} *)
Lemma fold_unfold_nat_fold_left_O :
  forall (V : Type) (z : V) (s : V -> V),
    nat_fold_left V z s O = z.
Admitted. (* for now *)
(* {END} *)
*)

(* {FOLD_UNFOLD_NAT_FOLD_LEFT_O} *)
Lemma fold_unfold_nat_fold_left_O :
  forall (V : Type) (z : V) (s : V -> V),
    nat_fold_left V z s O = z.
(* {END} *)
Proof.
  fold_unfold_tactic nat_fold_left.
Qed.

(*
(* {FOLD_UNFOLD_NAT_FOLD_LEFT_S_ADMITTED_FOR_NOW} *)
Lemma fold_unfold_nat_fold_left_S :
  forall (V : Type) (z : V) (s : V -> V) (n' : nat),
    nat_fold_left V z s (S n') = nat_fold_left V (s z) s n'.
Admitted. (* for now *)
(* {END} *)
*)

(* {FOLD_UNFOLD_NAT_FOLD_LEFT_S} *)
Lemma fold_unfold_nat_fold_left_S :
  forall (V : Type) (z : V) (s : V -> V) (n' : nat),
    nat_fold_left V z s (S n') = nat_fold_left V (s z) s n'.
(* {END} *)
Proof.
  fold_unfold_tactic nat_fold_left.
Qed.

(* ***** *)

(*
(* {ABOUT_NAT_FOLD_LEFT_WITH_ELLIPSES} *)
Lemma about_nat_fold_left :
  forall (V : Type) (z : V) (s : V -> V) (n : nat),
    nat_fold_left V (s z) s n = s (nat_fold_left V z s n).
Proof. ... Qed. (* see the accompanying .v file *)
(* {END} *)
*)

(* {ABOUT_NAT_FOLD_LEFT} *)
Lemma about_nat_fold_left :
  forall (V : Type) (z : V) (s : V -> V) (n : nat),
    nat_fold_left V (s z) s n = s (nat_fold_left V z s n).
(* {END} *)
Proof.
  intros V z s n.
  revert z.
  induction n as [ | n' IHn']; intro z.
  - rewrite ->2 fold_unfold_nat_fold_left_O.
    reflexivity.
  - rewrite ->2 fold_unfold_nat_fold_left_S.
    Check (IHn' (s z)).
    rewrite -> (IHn' (s z)).
    reflexivity.
Qed.

(*
(* {ABOUT_NAT_FOLD_RIGHT_WITH_ELLIPSES} *)
Lemma about_nat_fold_right :
  forall (V : Type) (z : V) (s : V -> V) (n : nat),
    nat_fold_right V (s z) s n = s (nat_fold_right V z s n).
Proof. ... Qed. (* see the accompanying .v file *)
(* {END} *)
*)

(* {ABOUT_NAT_FOLD_RIGHT} *)
Lemma about_nat_fold_right :
  forall (V : Type) (z : V) (s : V -> V) (n : nat),
    nat_fold_right V (s z) s n = s (nat_fold_right V z s n).
(* {END} *)
Proof.
  intros V z s n.
  revert z.
  induction n as [ | n' IHn']; intro z.
  - rewrite ->2 fold_unfold_nat_fold_right_O.
    reflexivity.
  - rewrite ->2 fold_unfold_nat_fold_right_S.
    Check (IHn' z).
    rewrite -> (IHn' z).
    reflexivity.
Qed.

(*
(* {FOLDING_LEFT_AND_RIGHT_WITH_ELLIPSES} *)
Theorem folding_left_and_right :
  forall (V : Type) (z : V) (s : V -> V) (n : nat),
    nat_fold_left V z s n = nat_fold_right V z s n.
Proof. ... Qed. (* see the accompanying .v file *)
(* {END} *)
*)

(* {FOLDING_LEFT_AND_RIGHT} *)
Theorem folding_left_and_right :
  forall (V : Type) (z : V) (s : V -> V) (n : nat),
    nat_fold_left V z s n = nat_fold_right V z s n.
(* {END} *)
Proof.
  intros V z s n.
  revert z.
  induction n as [ | n' IHn']; intro z.
  - rewrite -> fold_unfold_nat_fold_left_O.
    rewrite -> fold_unfold_nat_fold_right_O.
    reflexivity.
  - rewrite -> fold_unfold_nat_fold_left_S.
    rewrite -> fold_unfold_nat_fold_right_S.
(*
    rewrite <- (IHn' z).
    Check (about_nat_fold_left V z s n').
    exact (about_nat_fold_left V z s n').
*)
    rewrite -> (IHn' (s z)).
    Check (about_nat_fold_right V z s n').
    exact (about_nat_fold_right V z s n').
Qed.

(* ********** *)

(* Section 6.3 *)

(* ***** *)

(* {EVENP_AND_ODDP} *)
Fixpoint evenp (n : nat) : bool :=
  match n with
  | O    => true
  | S n' => oddp n'
  end
with oddp (n : nat) : bool :=
       match n with
       | O    => false
       | S n' => evenp n'
       end.
(* {END} *)

(* ***** *)

Definition test_evenp_and_oddp (evenp oddp : nat -> bool) (n : nat) : bool :=
  (eqb (evenp (2 * n)) true)
  &&
  (eqb (evenp (S (2 * n))) false)
  &&
  (eqb (oddp (S (2 * n))) true)
  &&
  (eqb (oddp (2 * n)) false).

Compute (let test n := test_evenp_and_oddp evenp oddp n
         in test 0 && test 1 && test 2 && test 3 && test 4 && test 5 && test 6 && test 7 && test 8).

(* ***** *)

(*
(* {FOLD_UNFOLD_EVENP_O_ADMITTED} *)
Lemma fold_unfold_evenp_O : evenp 0 = true.  Admitted.
(* {END} *)
*)

(* {FOLD_UNFOLD_EVENP_O} *)
Lemma fold_unfold_evenp_O : evenp 0 = true.
(* {END} *)
Proof.
  fold_unfold_tactic evenp.
Qed.

(*
(* {FOLD_UNFOLD_EVENP_S_ADMITTED} *)
Lemma fold_unfold_evenp_S : forall n' : nat, evenp (S n') = oddp n'.  Admitted.
(* {END} *)
*)

(* {FOLD_UNFOLD_EVENP_S} *)
Lemma fold_unfold_evenp_S : forall n' : nat, evenp (S n') = oddp n'.
(* {END} *)
Proof.
  fold_unfold_tactic evenp.
Qed.

(*
(* {FOLD_UNFOLD_ODDP_O_ADMITTED} *)
Lemma fold_unfold_oddp_O : oddp 0 = false.  Admitted.
(* {END} *)
*)

(* {FOLD_UNFOLD_ODDP_O} *)
Lemma fold_unfold_oddp_O : oddp 0 = false.
(* {END} *)
Proof.
  fold_unfold_tactic oddp.
Qed.

(*
(* {FOLD_UNFOLD_ODDP_S_ADMITTED} *)
Lemma fold_unfold_oddp_S : forall n' : nat, oddp (S n') = evenp n'.  Admitted.
(* {END} *)
*)

(* {FOLD_UNFOLD_ODDP_S} *)
Lemma fold_unfold_oddp_S : forall n' : nat, oddp (S n') = evenp n'.
(* {END} *)
Proof.
  fold_unfold_tactic oddp.
Qed.

(* ***** *)

Lemma twice_succ :
  forall n : nat,
    S (S (2 * n)) = 2 * S n.
Proof.
  intro n.
  rewrite -> (Nat.mul_comm 2 (S n)).
  Search (S _ * _ = _).
  rewrite -> (Nat.mul_succ_l n 2).
  rewrite -> (Nat.mul_comm n 2).
  rewrite -> (Nat.add_comm (2 * n) 2).
  rewrite ->2 plus_Sn_m.
  rewrite -> (Nat.add_0_l (2 * n)).
  reflexivity.
Qed.

(* ***** *)

(* {SOUNDNESS_OF_EVENP_AND_ODDP} *)
Theorem soundness_of_evenp_and_oddp :
  forall n : nat,
    (evenp n = true -> exists m : nat, n = 2 * m) /\ (oddp n = true -> exists m : nat, n = S (2 * m)).
(* {END} *)
Proof.
  intro n.
  induction n as [ | n' [IHeven IHodd]].
  - split.
    + intros _.
      exists 0.
      symmetry.
      exact (Nat.mul_0_r 2).
    + rewrite -> fold_unfold_oddp_O.
      intro H_absurd.
      discriminate H_absurd.
  - rewrite -> (fold_unfold_evenp_S n').
    rewrite -> (fold_unfold_oddp_S n').
    split.
    + intro H_oddp.
      destruct (IHodd H_oddp) as [m H_m].
      rewrite -> H_m.
      rewrite -> (twice_succ m).
      exists (S m).
      reflexivity.
    + intro H_evenp.
      destruct (IHeven H_evenp) as [m H_m].
      rewrite -> H_m.
      exists m.
      reflexivity.
Qed.

Lemma completeness_of_evenp :
  forall m : nat,
    evenp (2 * m) = true.
Proof.
  intro m.
  induction m as [ | m' IHm'].
  - rewrite -> Nat.mul_0_r.
    exact fold_unfold_evenp_O.
  - rewrite <- (twice_succ m').
    rewrite -> fold_unfold_evenp_S.
    rewrite -> fold_unfold_oddp_S.
    exact IHm'.
Qed.  

(* {COMPLETENESS_OF_EVENP_AND_ODDP} *)
Theorem completeness_of_evenp_and_oddp :
  forall m : nat,
    evenp (2 * m) = true /\ oddp (S (2 * m)) = true.
(* {END} *)
Proof.
  intro m.
  rewrite -> (fold_unfold_oddp_S (2 * m)).
  exact (conj (completeness_of_evenp m) (completeness_of_evenp m)).
Qed.

(*
(* {SOUNDNESS_AND_COMPLETENESS_OF_EVENP_AND_ODDP_WITH_ELLIPSES} *)
Theorem soundness_and_completeness_of_evenp_and_oddp :
  forall n : nat,
    (evenp n = true <-> exists m : nat, n = 2 * m)
    /\
    (oddp n = true <-> exists m : nat, n = S (2 * m)).
Proof. ... Qed. (* see the accompanying .v file *)
(* {END} *)
*)

(* {SOUNDNESS_AND_COMPLETENESS_OF_EVENP_AND_ODDP} *)
Theorem soundness_and_completeness_of_evenp_and_oddp :
  forall n : nat,
    (evenp n = true <-> exists m : nat, n = 2 * m)
    /\
    (oddp n = true <-> exists m : nat, n = S (2 * m)).
(* {END} *)
Proof.
  intro n.
  split.
  - split.
    + destruct (soundness_of_evenp_and_oddp n) as [ly _].
      exact ly.
    + intros [m H_m].
      rewrite -> H_m.
      destruct (completeness_of_evenp_and_oddp m) as [ly _].
      exact ly.
  - split.
    + destruct (soundness_of_evenp_and_oddp n) as [_ ly].
      exact ly.
    + intros [m H_m].
      rewrite -> H_m.
      destruct (completeness_of_evenp_and_oddp m) as [_ ly].
      exact ly.
Qed.

Lemma evenp_and_oddp_are_opposite :
  forall (n : nat)
         (b : bool),
    (evenp n = b -> oddp n = negb b)
    /\
    (oddp n = b -> evenp n = negb b).
Proof.
  intro n.
  induction n as [ | n' IHn'].
  - intro b.
    rewrite -> fold_unfold_evenp_O.
    rewrite -> fold_unfold_oddp_O.
    split.
    + intro H_b.
      rewrite <- H_b.
      unfold negb.
      reflexivity.
    + intro H_b.
      rewrite <- H_b.
      unfold negb.
      reflexivity.
  - intro b.
    rewrite -> (fold_unfold_evenp_S n').
    rewrite -> (fold_unfold_oddp_S n').
    destruct (IHn' b) as [IHeo IHoe].
    exact (conj IHoe IHeo).
Qed.

(*
(* {SOUNDNESS_AND_COMPLETENESS_OF_EVENP_AND_ODDP_TOO_WITH_ELLIPSES} *)
Corollary soundness_and_completeness_of_evenp_and_oddp_too :
  forall n : nat,
    (evenp n = false <-> exists m : nat, n = S (2 * m))
    /\
    (oddp n = false <-> exists m : nat, n = 2 * m).
Proof. ... Qed. (* see the accompanying .v file *)
(* {END} *)
*)

(* {SOUNDNESS_AND_COMPLETENESS_OF_EVENP_AND_ODDP_TOO} *)
Corollary soundness_and_completeness_of_evenp_and_oddp_too :
  forall n : nat,
    (evenp n = false <-> exists m : nat, n = S (2 * m))
    /\
    (oddp n = false <-> exists m : nat, n = 2 * m).
(* {END} *)
Proof.
  intro n.
  destruct (soundness_and_completeness_of_evenp_and_oddp n) as [[S_evenp C_evenp] [S_oddp C_oddp]].
  split.
  - split.
    + intro H_n.
      destruct (evenp_and_oddp_are_opposite n false) as [H_key _].
      unfold negb in H_key.
      exact (S_oddp (H_key H_n)).
    + intro H_n.
      destruct (evenp_and_oddp_are_opposite n true) as [_ H_key].
      unfold negb in H_key.
      exact (H_key (C_oddp H_n)).
  - split.
    + intro H_n.
      destruct (evenp_and_oddp_are_opposite n false) as [_ H_key].
      unfold negb in H_key.
      exact (S_evenp (H_key H_n)).
    + intro H_n.
      destruct (evenp_and_oddp_are_opposite n true) as [H_key _].
      unfold negb in H_key.
      exact (H_key (C_evenp H_n)).
Qed.

(* ********** *)

(* Section 6.4 *)

Require Import List.

Fixpoint list_append (V : Type) (vs ws : list V) : list V :=
  match vs with
  | nil      => ws
  | v :: vs' => v :: list_append V vs' ws
  end.

Lemma fold_unfold_list_append_nil :
  forall (V : Type)
         (ws : list V),
    list_append V nil ws = ws.
Proof.
  fold_unfold_tactic list_append.
Qed.

Lemma fold_unfold_list_append_cons :
  forall (V : Type)
         (v : V)
         (vs' ws : list V),
    list_append V (v :: vs') ws = v :: list_append V vs' ws.
Proof.
  fold_unfold_tactic list_append.
Qed.

Theorem list_append_is_associative :
  forall (V : Type)
         (v1s v2s v3s : list V),
    list_append V v1s (list_append V v2s v3s) = list_append V (list_append V v1s v2s) v3s.
Proof.
  intros V v1s v2s v3s.
  induction v1s as [ | v1 v1s'].
  - rewrite -> (fold_unfold_list_append_nil V (list_append V v2s v3s)).
    rewrite -> (fold_unfold_list_append_nil V v2s).
    reflexivity.
  - rewrite -> (fold_unfold_list_append_cons V v1 v1s' (list_append V v2s v3s)).
    rewrite -> (fold_unfold_list_append_cons V v1 v1s' v2s).
    rewrite -> (fold_unfold_list_append_cons V v1 (list_append V v1s' v2s)).
    rewrite -> IHv1s'.
    reflexivity.
Qed.
    
(* ********** *)

(* Section 6.4 *)

(* {STREAM} *)
CoInductive stream (V : Type) : Type :=
| Cons : V -> stream V -> stream V.
(* {END} *)

CoInductive bisimilar : forall V : Type, stream V -> stream V -> Prop :=
| Bisimilar :
    forall (V : Type)
           (eq_V : V -> V -> Prop)
           (v1 v2 : V)
           (v1s v2s : stream V),
    eq_V v1 v2 ->
    bisimilar V v1s v2s ->
    bisimilar V (Cons V v1 v1s) (Cons V v2 v2s).

(* ****** *)

(* Reasoning with streams, after Christine Paulin-Mohring: *)

Definition stream_decompose (V : Type) (vs : stream V) :=
  match vs with
  | Cons _ v vs' =>
    Cons V v vs'
  end.

Theorem stream_decomposition :
  forall (V : Type)
         (vs : stream V),
    vs = stream_decompose V vs.
Proof.
  intros V [v vs'].
  unfold stream_decompose.
  reflexivity.
Qed.

(* ****** *)

(* {STREAM_APPEND} *)
CoFixpoint stream_append (V : Type) (v1s v2s : stream V) :=
  match v1s with
  | Cons _ v1 v1s' =>
    Cons V v1 (stream_append V v1s' v2s)
  end.
(* {END} *)

(*
(* {FOLD_UNFOLD_STREAM_APPEND_WITH_ELLIPSES} *)
Lemma fold_unfold_stream_append :
  forall (V : Type) (v1 : V) (v1s' v2s : stream V),
    stream_append V (Cons V v1 v1s') v2s = Cons V v1 (stream_append V v1s' v2s).
Proof. ... Qed. (* see the accompanying .v file *)
(* {END} *)
*)

(* {FOLD_UNFOLD_STREAM_APPEND} *)
Lemma fold_unfold_stream_append :
  forall (V : Type) (v1 : V) (v1s' v2s : stream V),
    stream_append V (Cons V v1 v1s') v2s = Cons V v1 (stream_append V v1s' v2s).
(* {END} *)
Proof.
  intros V v1 v1s' v2s.
  rewrite -> (stream_decomposition V (stream_append V (Cons V v1 v1s') v2s)).
  unfold stream_decompose.
  unfold stream_append at 1; fold stream_append.
  reflexivity.
Qed.

Proposition about_stream_append :
  forall (V : Type)
         (eq_V : V -> V -> Prop),
    (forall v : V,
        eq_V v v) ->
    forall v1s v2s : stream V,
      bisimilar V (stream_append V v1s v2s) v1s.
Proof.
  intros V eq_V eq_V_refl.
  cofix coIH.
  intros [v1 v1s'] v2s.
  rewrite -> (fold_unfold_stream_append V v1 v1s' v2s).
  Check (Bisimilar V eq_V v1 v1 (stream_append V v1s' v2s) v1s').
  Check (Bisimilar V eq_V v1 v1 (stream_append V v1s' v2s) v1s' (eq_V_refl v1) (coIH v1s' v2s)).
  exact (Bisimilar V eq_V v1 v1 (stream_append V v1s' v2s) v1s' (eq_V_refl v1) (coIH v1s' v2s)).
Qed.

(* ********** *)

(* Section 6.5 *)

(* {COURSE_OF_VALUES} *)
Fixpoint course_of_values (P : nat -> Prop) (n : nat) : Prop :=
  match n with
  | 0    => P 0
  | S n' => P (S n') /\ course_of_values P n'
end.
(* {END} *)

Lemma fold_unfold_course_of_values_O :
  forall P : nat -> Prop,
    course_of_values P 0 =
    P 0.
Proof.
  fold_unfold_tactic course_of_values.
Qed.

Lemma fold_unfold_course_of_values_S :
  forall (P : nat -> Prop)
         (n' : nat),
    course_of_values P (S n') =
    (P (S n') /\ course_of_values P n').
Proof.
  fold_unfold_tactic course_of_values.
Qed.

(* {NAT_IND_COURSE_OF_VALUES} *)
Lemma nat_ind_course_of_values :
  forall P : nat -> Prop,
    P 0 ->
    (forall k : nat,
        course_of_values P k -> P (S k)) ->
    forall n : nat,
      P n.
(* {END} *)
Proof.
  intros P H_O H_S.
  assert (Helpful :
            forall x : nat,
              course_of_values P x).
  { intro x.
    induction x as [ | x' IHx'].

    - rewrite -> fold_unfold_course_of_values_O.
      exact H_O.

    - rewrite -> fold_unfold_course_of_values_S.
      Check (H_S x').
      Check (H_S x' IHx').
      exact (conj (H_S x' IHx') IHx'). }
  intros [ | n'].

  - exact H_O.

  - Check (H_S n').
    Check (H_S n' (Helpful n')).
    exact (H_S n' (Helpful n')).
Qed.

(* ********** *)

(* Section 7.1 *)

Check nth.
Print nth.

(* {FOLD_UNFOLD_NTH_NIL} *)
Lemma fold_unfold_nth_nil :
  forall (V : Type) (i : nat) (default : V),
    nth i nil default = match i with
                        | O    => default
                        | S i' => default
                        end.
(* {END} *)
Proof.
  fold_unfold_tactic nth.
Qed.

(* {FOLD_UNFOLD_NTH_CONS} *)
Lemma fold_unfold_nth_cons :
  forall (V : Type) (i : nat) (v : V) (vs' : list V) (default : V),
    nth i (v :: vs') default = match i with
                               | O    => v
                               | S i' => nth i' vs' default
                               end.
(* {END} *)
Proof.
  fold_unfold_tactic nth.
Qed.  

(* {FOLD_UNFOLD_NTH_O} *)
Lemma fold_unfold_nth_O :
  forall (V : Type) (vs : list V) (default : V),
    nth 0 vs default = match vs with
                       | nil      => default
                       | v :: vs' => v
                       end.
(* {END} *)
(* {PROOF_OF_FOLD_UNFOLD_NTH_O} *)
Proof. (* for the O case *)
  intros V [ | v vs'] default; reflexivity.
Qed.
(* {END} *)

(* {FOLD_UNFOLD_NTH_S} *)
Lemma fold_unfold_nth_S :
  forall (V : Type) (i' : nat) (vs : list V) (default : V),
    nth (S i') vs default = match vs with
                            | nil      => default
                            | v :: vs' => nth i' vs' default
                            end.
(* {END} *)
(* {PROOF_OF_FOLD_UNFOLD_NTH_S} *)
Proof. (* for the S case *)
  intros V i' [ | v vs'] default; reflexivity.
Qed.
(* {END} *)

(* {FOLD_UNFOLD_NTH_O_NIL} *)
Lemma fold_unfold_nth_O_nil :
  forall (V : Type) (default : V),
    nth 0 nil default = default.
(* {END} *)
(* {PROOF_OF_FOLD_UNFOLD_NTH_O_NIL} *)
Proof.
  fold_unfold_tactic nth.
Qed.
(* {END} *)

(* {FOLD_UNFOLD_NTH_O_CONS} *)
Lemma fold_unfold_nth_O_cons :
  forall (V : Type) (v : V) (vs' : list V) (default : V),
    nth 0 (v :: vs') default = v.
(* {END} *)
(* {PROOF_OF_FOLD_UNFOLD_NTH_O_CONS} *)
Proof.
  fold_unfold_tactic nth.
Qed.
(* {END} *)

(* {FOLD_UNFOLD_NTH_S_NIL} *)
Lemma fold_unfold_nth_S_nil :
  forall (V : Type) (i' : nat) (default : V),
    nth (S i') nil default = default.
(* {END} *)
(* {PROOF_OF_FOLD_UNFOLD_NTH_S_NIL} *)
Proof.
  fold_unfold_tactic nth.
Qed.
(* {END} *)

(* {FOLD_UNFOLD_NTH_S_CONS} *)
Lemma fold_unfold_nth_S_cons :
  forall (V : Type) (i' : nat) (v : V) (vs' : list V) (default : V),
    nth (S i') (v :: vs') default = nth i' vs' default.
(* {END} *)
(* {PROOF_OF_FOLD_UNFOLD_NTH_S} *)
Proof.
  fold_unfold_tactic nth.
Qed.
(* {END} *)

Fixpoint list_nth (V : Type) (i : nat) (vs : list V) (default : V) : V :=
  match i with
  | O =>
    match vs with
    | nil =>
      default
    | v :: vs' =>
      v
    end
  | S i' =>
    match vs with
    | nil =>
      default
    | v :: vs' =>
      list_nth V i' vs' default
    end
  end.

Lemma fold_unfold_list_nth_nil :
  forall (V : Type) (i : nat) (default : V),
    list_nth V i nil default =
    match i with
    | O    => default
    | S i' => default
    end.
(* {PROOF_OF_FOLD_UNFOLD_LIST_NTH_NIL} *)
Proof. (* for the nil case *)
  intros V [ | i'] default; reflexivity.
Qed.
(* {END} *)

Lemma fold_unfold_list_nth_cons :
  forall (V : Type) (i : nat) (v : V) (vs' : list V) (default : V),
    list_nth V i (v :: vs') default =
    match i with
    | O    => v
    | S i' => list_nth V i' vs' default
    end.
(* {PROOF_OF_FOLD_UNFOLD_LIST_NTH_CONS} *)
Proof. (* for the cons case *)
  intros V [ | i'] v vs' default; reflexivity.
Qed.
(* {END} *)

Lemma fold_unfold_list_nth_O :
  forall (V : Type) (vs : list V) (default : V),
    list_nth V 0 vs default =
    match vs with
    | nil      => default
    | v :: vs' => v
    end.
Proof.
  fold_unfold_tactic list_nth.
Qed.

Lemma fold_unfold_list_nth_S :
  forall (V : Type) (i' : nat) (vs : list V) (default : V),
    list_nth V (S i') vs default =
    match vs with
    | nil      => default
    | v :: vs' => list_nth V i' vs' default
    end.
Proof.
  fold_unfold_tactic list_nth.
Qed.

(* ********** *)

(* Section 7.2 *)

(* Needed or not to use Function, depending on the version of Coq: *)

(* Require Import FunInd. *)

(* {MIRROR_ALT} *)
Function mirror_alt (V : Type) (t : binary_tree V) : binary_tree V :=
  match t with
  | Leaf _ v     => Leaf V v
  | Node _ t1 t2 => Node V (mirror_alt V t2) (mirror_alt V t1)
  end.
(* {END} *)

Check mirror_alt_equation.
(* :
(* {MIRROR_ALT_EQUATION} *)
forall (V : Type) (t : binary_tree V),
  mirror_alt V t =
  match t with
  | Leaf _ v     => Leaf V v
  | Node _ t1 t2 => Node V (mirror_alt V t2) (mirror_alt V t1)
  end
(* {END} *)
*)

(* {FOLD_UNFOLD_MIRROR_ALT_LEAF} *)
Definition fold_unfold_mirror_alt_Leaf (V : Type) (v : V) :=
  mirror_alt_equation V (Leaf V v).
(* {END} *)

Check fold_unfold_mirror_alt_Leaf.
(* :
(* {TYPE_OF_FOLD_UNFOLD_MIRROR_ALT_LEAF} *)
forall (V : Type) (v : V),
  mirror_alt V (Leaf V v) = Leaf V v
(* {END} *)
*)

(* {FOLD_UNFOLD_MIRROR_ALT_NODE} *)
Definition fold_unfold_mirror_alt_Node (V : Type) (t1 t2 : binary_tree V) :=
  mirror_alt_equation V (Node V t1 t2).
(* {END} *)

Check fold_unfold_mirror_alt_Node.
(*  :
(* {TYPE_OF_FOLD_UNFOLD_MIRROR_ALT_NODE} *)
forall (V : Type) (t1 t2 : binary_tree V),
  mirror_alt V (Node V t1 t2) = Node V (mirror_alt V t2) (mirror_alt V t1)
(* {END} *)
*)

(* ********** *)

(* Section 8 *)

(* Equality predicates: *)

Definition beq_pair (X : Type) (beq_X : X -> X -> bool) (Y : Type) (beq_Y : Y -> Y -> bool) (p1 p2 : X * Y) : bool :=
  match p1 with
  | (x1, y1) =>
    match p2 with
    | (x2, y2) =>
      beq_X x1 x2 && beq_Y y1 y2
    end
  end.

Fixpoint beq_list (V : Type) (beq_V : V -> V -> bool) (v1s v2s : list V) : bool :=
  match v1s with
  | nil =>
    match v2s with
    | nil =>
      true
    | v2 :: v2s' =>
      false
    end
  | v1 :: v1s' =>
    match v2s with
    | nil =>
      false
    | v2 :: v2s' =>
      beq_V v1 v2 && beq_list V beq_V v1s' v2s'
    end
  end.

Definition beq_option (V : Type) (beq_V : V -> V -> bool) (ov1 ov2 : option V) : bool :=
  match ov1 with
  | None =>
    match ov2 with
    | None =>
      true
    | Some v2 =>
      false
    end
  | Some v1 =>
    match ov2 with
    | None =>
      false
    | Some v2 =>
      beq_V v1 v2
    end
  end.

(* Unit-test function: *)

Definition test_self_convolution (candidate : forall V : Type, list V -> option (list (V * V))) : bool :=
  beq_option (list (nat * nat))
             (beq_list (nat * nat) (beq_pair nat beq_nat nat beq_nat))
             (candidate nat nil)
             (Some nil)
  &&
  beq_option (list (nat * nat))
             (beq_list (nat * nat) (beq_pair nat beq_nat nat beq_nat))
             (candidate nat (1 :: nil))
             (Some ((1, 1) :: nil))
  &&
  beq_option (list (nat * nat))
             (beq_list (nat * nat) (beq_pair nat beq_nat nat beq_nat))
             (candidate nat (1 :: 2 :: nil))
             (Some ((1, 2) :: (2, 1) :: nil))
  &&
  beq_option (list (nat * nat))
             (beq_list (nat * nat) (beq_pair nat beq_nat nat beq_nat))
             (candidate nat (1 :: 2 :: 3 :: nil))
             (Some ((1, 3) :: (2, 2) :: (3, 1) :: nil)).

(* {SELF_CNV} *)
Definition convolve_thyself (V : Type) (vs : list V) : option (list (V * V)) :=
  let fix visit (vs_sfx : list V) : option (list V * list (V * V)) :=
      match vs_sfx with
      | nil          => Some (vs, nil)
      | v :: vs_sfx' => match visit vs_sfx' with
                        | Some (ws, ps) => match ws with
                                           | nil      => None (* impossible case *)
                                           | w :: ws' => Some (ws', (v, w) :: ps)
                                           end
                        | None          => None
                        end
      end 
  in match visit vs with
     | Some (ws, ps) => match ws with
                        | nil      => Some ps
                        | w :: ws' => None (* impossible case *)
                        end
     | None          => None
     end.
(* {END} *)

Compute (test_self_convolution convolve_thyself).

(* Basic fold-unfold lemmas: *)

(* ***** *)

Lemma fold_unfold_app_nil :
  forall (V : Type)
         (vs : list V),
    nil ++ vs = vs.
Proof.
  fold_unfold_tactic app.
Qed.

Lemma fold_unfold_app_cons :
  forall (V : Type)
         (v1 : V)
         (v1s' v2s : list V),
    (v1 :: v1s') ++ v2s = v1 :: (v1s' ++ v2s).
Proof.
  fold_unfold_tactic app.
Qed.

(* ***** *)

Lemma fold_unfold_length_nil :
  forall (V : Type),
    length (@nil V) = 0.
Proof.
  fold_unfold_tactic length.
Qed.

Lemma fold_unfold_length_cons :
  forall (V : Type)
         (v : V)
         (vs' : list V),
    length (v :: vs') = S (length vs').
Proof.
  fold_unfold_tactic length.
Qed.

(* ***** *)

Lemma fold_unfold_rev_nil :
  forall (V : Type),
    rev (@nil V) = nil.
Proof.
  fold_unfold_tactic rev.
Qed.

Lemma fold_unfold_rev_cons :
  forall (V : Type)
         (v : V)
         (vs' : list V),
    rev (v :: vs') = rev vs' ++ (v :: nil).
Proof.
  fold_unfold_tactic rev.
Qed.

(* ***** *)

Lemma fold_unfold_map_nil :
  forall (V W : Type)
         (f : V -> W),
    map f nil = nil.
Proof.
  fold_unfold_tactic map.
Qed.

Lemma fold_unfold_map_cons :
  forall (V W : Type)
         (f : V -> W)
         (v : V)
         (vs' : list V),
    map f (v :: vs') =
    f v :: map f vs'.
Proof.
  fold_unfold_tactic map.
Qed.

(* Useful lemmas: *)

Lemma about_a_list_of_length_zero :
  forall (V : Type)
         (vs : list V),
    length vs = 0 ->
    vs = nil.
Proof.
  intros V [ | v vs'] H_length.
  - reflexivity.
  - rewrite -> fold_unfold_length_cons in H_length.
    discriminate H_length.
Qed.

Lemma about_a_list_of_length_non_zero :
  forall (V : Type)
         (n : nat)
         (vs : list V),
    S n = length vs ->
    exists (v : V)
           (vs' : list V),
      vs = v :: vs'.
Proof.
  intros V n [ | v vs'] H_length.
  - rewrite -> fold_unfold_length_nil in H_length.
    discriminate H_length.
  - exists v, vs'.
    reflexivity.
Qed.

(* {FROM_FIRST_AND_SUFFIX_TO_PREFIX_AND_LAST} *)
Property from_first_and_suffix_to_prefix_and_last :
  forall (V : Type) (v : V) (vs : list V),
    exists (ws : list V) (w : V),
      v :: vs = ws ++ w :: nil /\ length vs = length ws.
(* {END} *)
Proof.
  intros V v vs.
  revert v.
  induction vs as [ | v' vs']; intro v.
  - exists nil, v.
    rewrite -> fold_unfold_app_nil.
    split; reflexivity.
  - destruct (IHvs' v') as [ws [w [H_key H_length]]].
    exists (v :: ws), w.
    split.
    + rewrite -> fold_unfold_app_cons.
      rewrite <- H_key.
      reflexivity.
    + rewrite ->2 fold_unfold_length_cons.
      apply f_equal.
      exact H_length.
Qed.

(* {SOUNDNESS_AND_TOTALITY_OF_SELF_CNV} *)
Theorem soundness_and_totality_of_convolve_thyself :
  forall (V : Type) (vs : list V) (ops : option (list (V * V))),
    convolve_thyself V vs = ops ->
    exists ps : list (V * V),
      ops = Some ps /\ map fst ps = vs /\ map snd ps = rev vs.
(* {END} *)
Proof.
  intros V vs ops H_ops.
  unfold convolve_thyself in H_ops.
  remember (fix visit (vs_sfx : list V) : option (list V * list (V * V)) :=
               match vs_sfx with
               | nil => Some (vs, nil)
               | v :: vs_sfx' =>
                   match visit vs_sfx' with
                   | Some (w :: ws', ps) => Some (ws', (v, w) :: ps)
                   | _ => None
                   end
               end) as visit eqn:D_visit.
  assert (fold_unfold_visit_nil :
            visit nil =
            Some (vs, nil)).
  { rewrite -> D_visit.
    reflexivity. }
  assert (fold_unfold_visit_cons :
            forall (v : V)
                   (vs_sfx' : list V),
              visit (v :: vs_sfx') =
              match visit vs_sfx' with
              | Some (w :: ws', ps) => Some (ws', (v, w) :: ps)
              | _ => None
              end).
  { intros v vs_sfx.
    rewrite -> D_visit.
    reflexivity. }
  assert (about_visit :
            forall (vs_sfx ws_pfx : list V),
              length vs_sfx = length ws_pfx ->
              forall ws_sfx : list V,
                vs = ws_pfx ++ ws_sfx ->
                exists ps : list (V * V),
                  visit vs_sfx = Some (ws_sfx, ps) /\
                  map fst ps = vs_sfx /\ map snd ps = rev ws_pfx).
  { intro vs_sfx.
    induction vs_sfx as [ | v vs_sfx' IH_vs_sfx']; intros ws_pfx H_length ws_sfx H_vs.
    - rewrite -> fold_unfold_length_nil in H_length.
      Check (about_a_list_of_length_zero V ws_pfx (eq_sym H_length)).
      rewrite -> (about_a_list_of_length_zero V ws_pfx (eq_sym H_length)).
      exists nil.
      rewrite -> (about_a_list_of_length_zero V ws_pfx (eq_sym H_length)) in H_vs.
      rewrite -> app_nil_l in H_vs.
      rewrite <- H_vs.
      rewrite ->2 fold_unfold_map_nil.
      rewrite -> fold_unfold_rev_nil.
      split; [exact fold_unfold_visit_nil | split; reflexivity].
    - rewrite -> fold_unfold_visit_cons.
      rewrite -> fold_unfold_length_cons in H_length.
      Check (about_a_list_of_length_non_zero V (length vs_sfx') ws_pfx H_length).
      destruct (about_a_list_of_length_non_zero V (length vs_sfx') ws_pfx H_length) as [w [ws' H_ws_pfx]].
      Check (from_first_and_suffix_to_prefix_and_last V w ws').
      destruct (from_first_and_suffix_to_prefix_and_last V w ws') as [ws_pfx' [w' [H_swap H_length']]].
      rewrite -> H_ws_pfx in H_length.
      rewrite -> fold_unfold_length_cons in H_length.
      injection H_length as H_length.
      rewrite -> H_length' in H_length.
      Check (IH_vs_sfx' ws_pfx' H_length).
      Check (IH_vs_sfx' ws_pfx' H_length (w' :: ws_sfx)).
      rewrite -> H_ws_pfx in H_vs.
      rewrite -> H_swap in H_vs.
      rewrite <- app_assoc in H_vs.
      rewrite -> fold_unfold_app_cons in H_vs.
      rewrite -> fold_unfold_app_nil in H_vs.
      Check (IH_vs_sfx' ws_pfx' H_length (w' :: ws_sfx)).
      Check (IH_vs_sfx' ws_pfx' H_length (w' :: ws_sfx) H_vs).
      destruct (IH_vs_sfx' ws_pfx' H_length (w' :: ws_sfx) H_vs) as [ps [H_visit [H_fst H_snd]]].
      exists ((v, w') :: ps).
      rewrite -> H_visit.
      split.
      { reflexivity. }
      split.
      { rewrite -> fold_unfold_map_cons.
        simpl (fst (v, w')).
        rewrite -> H_fst.
        reflexivity. }
      rewrite -> fold_unfold_map_cons.
      simpl (snd (v, w')).
      rewrite -> H_snd.
      rewrite -> H_ws_pfx.
      rewrite -> H_swap.
      rewrite -> rev_app_distr.
      rewrite -> fold_unfold_rev_cons.
      rewrite -> fold_unfold_rev_nil.
      rewrite -> fold_unfold_app_nil.
      rewrite -> fold_unfold_app_cons.
      rewrite -> fold_unfold_app_nil.
      reflexivity. }
  Check (about_visit vs vs (eq_refl (length vs))).
  Check (about_visit vs vs (eq_refl (length vs)) nil).
  Check (app_nil_r vs).
  Check (eq_sym (app_nil_r vs)).
  Check (about_visit vs vs (eq_refl (length vs)) nil (eq_sym (app_nil_r vs))).
  destruct (about_visit vs vs (eq_refl (length vs)) nil (eq_sym (app_nil_r vs))) as [ps [H_visit [H_fst H_snd]]].
  exists ps.
  rewrite -> H_visit in H_ops.
  split.
    exact (eq_sym H_ops).
  split.
    exact H_fst.
  exact H_snd.
Qed.

(* ********** *)

(* {NAT_FOLD_RIGHT_DROPPED} *)
Definition nat_fold_right_dropped (V : Type) (z : V) (s : V -> V) (n : nat) : V :=
  let fix visit n :=
    match n with
    | O    => z
    | S n' => s (visit n')
    end
  in visit n.
(* {END} *)

(* {NAT_FOLD_RIGHT_LIFTED} *)
Fixpoint nat_fold_right_lifted (V : Type) (z : V) (s : V -> V) (n : nat) : V :=
  match n with
  | O    => z
  | S n' => s (nat_fold_right_lifted V z s n')
  end.
(* {END} *)

(* {FOLD_UNFOLD_NAT_FOLD_RIGHT_LIFTED_O} *)
Lemma fold_unfold_nat_fold_right_lifted_O :
  forall (V : Type) (z : V) (s : V -> V),
    nat_fold_right_lifted V z s O = z.
Proof.
  fold_unfold_tactic nat_fold_right_lifted.
Qed.
(* {END} *)

(* {FOLD_UNFOLD_NAT_FOLD_RIGHT_LIFTED_S} *)
Lemma fold_unfold_nat_fold_right_lifted_S :
  forall (V : Type) (z : V) (s : V -> V) (n' : nat),
    nat_fold_right_lifted V z s (S n') = s (nat_fold_right_lifted V z s n').
Proof.
  fold_unfold_tactic nat_fold_right_lifted.
Qed.
(* {END} *)

(* {FUNCTIONAL_EQUIVALENCE_OF_NAT_FOLD_RIGHT_LIFTED_AND_NAT_FOLD_RIGHT_DROPPED} *)
Lemma functional_equivalence_of_nat_fold_right_lifted_and_nat_fold_right_dropped :
  forall (V : Type) (z : V) (s : V -> V) (m : nat),
    nat_fold_right_lifted V z s m = nat_fold_right_dropped V z s m.
(* {END} *)
(* {PROOF_OF_FUNCTIONAL_EQUIVALENCE_OF_NAT_FOLD_RIGHT_LIFTED_AND_NAT_FOLD_RIGHT_DROPPED_1_OUT_OF_3} *)
Proof.
  intros V z s m.
  unfold nat_fold_right_dropped.
  remember (fix visit (n : nat) : V := match n with
                                       | 0 => z
                                       | S n' => s (visit n')
                                       end) as visit eqn:D_visit.
(* {END} *)
(* {PROOF_OF_FUNCTIONAL_EQUIVALENCE_OF_NAT_FOLD_RIGHT_LIFTED_AND_NAT_FOLD_RIGHT_DROPPED_2_OUT_OF_3} *)
  assert (fold_unfold_visit_O :
            visit 0 = z).
  { rewrite -> D_visit.
    reflexivity. }
  assert (fold_unfold_visit_S :
            forall n' : nat,
              visit (S n') = s (visit n')).
  { rewrite -> D_visit.
    reflexivity. }
(* {END} *)
(* {PROOF_OF_FUNCTIONAL_EQUIVALENCE_OF_NAT_FOLD_RIGHT_LIFTED_AND_NAT_FOLD_RIGHT_DROPPED_3_OUT_OF_3} *)
  induction m as [ | m' IHm'].
  { (* goal:  nat_fold_right_lifted V z s 0 = visit 0 *)
    rewrite -> (fold_unfold_nat_fold_right_lifted_O V z s).
    rewrite -> fold_unfold_visit_O.
    reflexivity. }
  { (* IHm' : nat_fold_right_lifted V z s m' = visit m' *)
    (* goal: nat_fold_right_lifted V z s (S m') = visit (S m') *)
    rewrite -> (fold_unfold_nat_fold_right_lifted_S V z s m').
    rewrite -> (fold_unfold_visit_S m').
    rewrite -> IHm'.
    reflexivity. }
Qed.
(* {END} *)

Definition nat_fold_left_dropped (V : Type) (z : V) (s : V -> V) (n : nat) : V :=
  let fix loop n a :=
    match n with
    | O    => a
    | S n' => loop n' (s a)
    end
  in loop n z.

Fixpoint nat_fold_left_lifted (V : Type) (z : V) (s : V -> V) (n : nat) : V :=
  match n with
  | O    => z
  | S n' => nat_fold_left_lifted V (s z) s n'
  end.

Lemma fold_unfold_nat_fold_left_lifted_O :
  forall (V : Type) (z : V) (s : V -> V),
    nat_fold_left_lifted V z s O = z.
Proof.
  fold_unfold_tactic nat_fold_left_lifted.
Qed.

Lemma fold_unfold_nat_fold_left_lifted_S :
  forall (V : Type) (z : V) (s : V -> V) (n' : nat),
    nat_fold_left_lifted V z s (S n') = nat_fold_left_lifted V (s z) s n'.
Proof.
  fold_unfold_tactic nat_fold_left_lifted.
Qed.

Proposition functional_equivalence_of_nat_fold_left_lifted_and_nat_fold_left_dropped :
  forall (V : Type) (z : V) (s : V -> V) (m : nat),
    nat_fold_left_lifted V z s m = nat_fold_left_dropped V z s m.
Proof.
  intros V z s m.
  unfold nat_fold_left_dropped.
  remember (fix loop (n : nat) (a : V) : V := match n with
                                              | 0 => a
                                              | S n' => loop n' (s a)
                                              end) as loop eqn:D_loop.
  assert (fold_unfold_loop_O :
            forall a : V,
              loop 0 a = a).
  { rewrite -> D_loop.
    reflexivity. }
  assert (fold_unfold_loop_S :
            forall (n' : nat) (a : V),
              loop (S n') a = loop n' (s a)).
  { rewrite -> D_loop.
    reflexivity. }
  revert z.
  induction m as [ | m' IHm'].
  { intro a.
    (* goal: nat_fold_left_lifted V a s 0 = loop 0 a *)
    rewrite -> (fold_unfold_nat_fold_left_lifted_O V a s).
    rewrite -> (fold_unfold_loop_O a).
    reflexivity. }
  { intro a.
    (* goal: nat_fold_left_lifted V a s (S m') = loop (S m') a *)
    rewrite -> (fold_unfold_nat_fold_left_lifted_S V a s m').
    rewrite -> (fold_unfold_loop_S m' a).
    rewrite -> (IHm' (s a)).
    reflexivity. }
Qed.

(* ********** *)

(* end of fold_unfold_lemmas.v *)
